# Supplementary material
Source: publisher figshare collection journal article supplement (https://acs.figshare.com/ndownloader/files/7614547)
Supplement: Supplementary file 1 [file 7614547]

## Sheet: Sheet1
Organism	Acession	Initial annotation	Organism type
Chondrus crispus	XP_005712784.1	unnamed product	Alga
Pyropia haitanensis	ALX18653.1	DHQS/O-MT fusion	Alga
Anabaena sp. 90	AFW95872.1	DHQS	Cyanobacteria
Anabaena sp. 90	WP_051155244.1	DHQS	Cyanobacteria
Anabaena sp. PCC 7108	WP_016949472.1	DHQS	Cyanobacteria
Aphanizomenon flos-aquae	WP_051424332.1	DHQS	Cyanobacteria
Aphanothece halophytica	BAO51913.1	DDGS	Cyanobacteria
Coleofasciculus chthonoplastes	WP_044206485.1	DHQS	Cyanobacteria
Coleofasciculus chthonoplastes PCC 7420	EDX76593.1	DHQS	Cyanobacteria
Crocosphaera watsonii	WP_007304325.1	DHQS	Cyanobacteria
Crocosphaera watsonii	WP_007311103.1	DHQS	Cyanobacteria
Cyanothece	WP_009547444.1	DHQS	Cyanobacteria
Cyanothece sp. CCY0110	WP_008274186.1	DHQS	Cyanobacteria
Dactylococcopsis salina	WP_015229181.1	DHQS	Cyanobacteria
filamentous cyanobacterium ESFC-1	WP_018396024.1	Hyp. protein	Cyanobacteria
Gloeocapsa sp. PCC 73106	WP_006527738.1	DHQS	Cyanobacteria
Halothece sp. PCC 7418	WP_015225652.1	DHQS	Cyanobacteria
Leptolyngbya sp. Heron Island J	WP_023072000.1	DHQS	Cyanobacteria
Leptolyngbya sp. PCC 7375	WP_006516570.1	DHQS	Cyanobacteria
Leptolyngbya sp. PCC 7376	WP_015132350.1	DHQS	Cyanobacteria
Moorea producens	WP_008182599.1	DHQS	Cyanobacteria
Oscillatoria sp. PCC 10802	WP_044170621.1	DHQS	Cyanobacteria
Pleurocapsa sp. PCC 7319	WP_036798727.1	DHQS	Cyanobacteria
Richelia intracellularis	CDN11332.1	DDGS	Cyanobacteria
Rubidibacter lacunae	WP_022606420.1	DHQS	Cyanobacteria
Synechococcus sp. PCC 7335	EDX85523.1	DHQS	Cyanobacteria
Synechococcus sp. PCC 7335	WP_050766003.1	DHQS	Cyanobacteria
Trichodesmium erythraeum	WP_011612491.1	DHQS	Cyanobacteria
Trichodesmium erythraeum	WP_047164818.1	DHQS	Cyanobacteria
Xenococcus sp. PCC 7305	WP_006509782.1	DHQS	Cyanobacteria
Heterocapsa triquetra	ABF61766.1	DHQS/O-MT fusion	Dinoflagellate
Karlodinium veneficum	ABF61768.1	DHQS	Dinoflagellate
Oxyrrhis marina	ABF61767.1	DHQS/O-MT fusion	Dinoflagellate
Exaiptasia pallida	KXJ07711.1	EEVS	Fungi
Lewinella sp. 4G2	OAV43358.1	DHQS	Gram-(-)
Halomonas sp. PR-M31	WP_053070660.1	DHQS	Gram-(-)
Kibdelosporangium aridum	WP_033386289.1	Hyp. protein	Gram-(+)
Kineosporia aurantiaca	WP_052531497.1	DHQS	Gram-(+)
Saccharothrix syringae	WP_051765629.1	DHQS	Gram-(+)
Acropora digitifera	XP_015764034.1	EEVS -like	Invertebrate
Exaiptasia pallida	KXJ07711.1	EEVS	Invertebrate
Nematostella vectensis	XP_001632539.1	Predicted protein	Invertebrate
